# Supplementary material for: Serotype Distribution and Antimicrobial Susceptibility Pattern of Streptococcus pneumoniae in COVID-19 Pandemic Era in Brazil
Source: MDPI journal article supplement (doi:10.3390/microorganisms12020401), 2024-02-17
Supplement: s1 [file s1]

Table S1. Epidemiologic data from the invasive *S. pneumoniae* isolates by age group and period studied.

| Age group | Epidemiologic data  | Pre-COVID-19<br>(January 2016-January 2020)<br>N=2004 | COVID-19<br>(February 2020-May 2022)<br>N=767 | Total<br>N=2771 |
|-----------|---------------------|-------------------------------------------------------|-----------------------------------------------|-----------------|
| <5 years  | Total               | 657 (69.0%)                                           | 295 (31.0%)                                   | 952             |
|           | Mean age            | 1.2 years                                             | 8 months                                      |                 |
|           |                     | (1 month-4 years)                                     | (1 month-4 years)                             | -               |
|           | Clinical diagnosis: |                                                       |                                               |                 |
|           | Meningitis          | 263 (78.3%)                                           | 73 (21.7%)                                    | 336             |
| ≥50 years | Non-meningitis      | 394 (64.0%)                                           | 222 (36.0%)                                   | 616             |
|           | Total               | 1347 (74.1%)                                          | 472 (25.9%)                                   | 1819            |
|           | Mean age            | 74.5 years                                            | 72.2 years                                    |                 |
|           |                     | (50-99 years)                                         | (50-99 years)                                 | -               |
|           | Clinical diagnosis: |                                                       |                                               |                 |
|           | Meningitis          | 439 (80.1%)                                           | 109 (19.9%)                                   | 548             |
|           | Non-meningitis      | 908 (71.4%)                                           | 363 (28.6%)                                   | 1271            |
